# Supplementary material for: Four novel topological frameworks based on 4,4′-(hexafluoroisopropylidene)diphthalic acid and 1,1′-(1,4-butanediyl)bis(imidazole) ligand
Source: Royal Society of Chemistry journal article supplement (doi:10.1039/c0ce00181c), 2010-01-01
Supplement: c0ce00181c.pdf [file c0ce00181c.pdf]

## Electronic supplementary information (ESI)

---

**Four novel topological frameworks based on  
4,4'-(hexafluoroisopropylidene)diphthalic acid and  
1,1'-(1,4-butanediyl)bis(imidazole) ligand**

**Lai-Ping Zhang, Jian-Fang Ma,\* Yuan-Yuan Pang, Ji-Cheng Ma, and Jin Yang\***

*Key Lab of Polyoxometalate Science, Department of Chemistry, Northeast Normal University, Changchun 130024, People's Republic of China*

\* Correspondence author: Prof. Jian-Fang Ma

E-mail: jianfangma@yahoo.com.cn

Fax: +86-431-85098620

\* Correspondence author: Dr. Jin Yang

E-mail: yangjinnenu@yahoo.com.cn

**Table S1.** Selected bond distances (Å) and angles (°) for **1**.

|                                 |            |                                              |            |
|---------------------------------|------------|----------------------------------------------|------------|
| Cd(1)-N(5)                      | 2.230(3)   | Cd(1)-O(3) <sup>#1</sup>                     | 2.417(3)   |
| Cd(1)-N(1)                      | 2.287(3)   | Cd(1)-O(3W)                                  | 2.421(3)   |
| Cd(1)-O(2)                      | 2.365(2)   | Cd(1)-O(1)                                   | 2.591(2)   |
| N(5)-Cd(1)-N(1)                 | 100.55(10) | N(5)-Cd(1)-O(1)                              | 85.33(9)   |
| N(5)-Cd(1)-O(2)                 | 138.09(8)  | N(1)-Cd(1)-O(1)                              | 105.11(9)  |
| N(1)-Cd(1)-O(2)                 | 89.31(9)   | O(2)-Cd(1)-O(1)                              | 52.86(7)   |
| N(5)-Cd(1)-O(3) <sup>#1</sup>   | 129.10(9)  | O(3) <sup>#1</sup> -Cd(1)-O(1)               | 143.12(8)  |
| N(1)-Cd(1)-O(3) <sup>#1</sup>   | 83.41(9)   | O(3W)-Cd(1)-O(1)                             | 79.32(9)   |
| O(2)-Cd(1)-O(3) <sup>#1</sup>   | 92.26(8)   | N(5)-Cd(1)-O(4) <sup>#1</sup>                | 80.00(9)   |
| N(5)-Cd(1)-O(3W)                | 97.45(9)   | N(1)-Cd(1)-O(4) <sup>#1</sup>                | 107.17(10) |
| N(1)-Cd(1)-O(3W)                | 161.73(9)  | O(2)-Cd(1)-O(4) <sup>#1</sup>                | 135.80(8)  |
| O(2)-Cd(1)-O(3W)                | 79.24(8)   | O(3) <sup>#1</sup> -Cd(1)-O(4) <sup>#1</sup> | 51.24(8)   |
| O(3) <sup>#1</sup> -Cd(1)-O(3W) | 82.88(8)   | O(3W)-Cd(1)-O(4) <sup>#1</sup>               | 72.94(9)   |
| O(1)-Cd(1)-O(4) <sup>#1</sup>   | 146.43(9)  |                                              |            |

Symmetry codes for **1**: #1 = -x + 1, -y + 1, -z.

**Table S2.** Selected bond distances (Å) and angles (°) for **2**.

|                                              |            |                                              |           |
|----------------------------------------------|------------|----------------------------------------------|-----------|
| Cd(1)-O(5) <sup>#1</sup>                     | 2.263(3)   | Cd(2)-O(7) <sup>#3</sup>                     | 2.268(3)  |
| Cd(1)-N(1)                                   | 2.276(4)   | Cd(2)-O(4) <sup>#4</sup>                     | 2.280(3)  |
| Cd(1)-O(8) <sup>#3</sup>                     | 2.281(3)   | Cd(2)-O(1W)                                  | 2.296(4)  |
| Cd(1)-O(6) <sup>#2</sup>                     | 2.304(3)   | Cd(2)-O(6) <sup>#2</sup>                     | 2.342(3)  |
| Cd(1)-O(3)                                   | 2.328(3)   | Cd(2)-O(2W)                                  | 2.377(4)  |
| Cd(1)-O(1)                                   | 2.362(3)   | Cd(2)-O(1)                                   | 2.383(4)  |
| O(5) <sup>#1</sup> -Cd(1)-N(1)               | 94.72(10)  | O(5) <sup>#1</sup> -Cd(1)-O(8) <sup>#3</sup> | 85.93(10) |
| N(1)-Cd(1)-O(8) <sup>#3</sup>                | 91.34(11)  | O(5) <sup>#1</sup> -Cd(1)-O(6) <sup>#2</sup> | 98.36(9)  |
| N(1)-Cd(1)-O(6) <sup>#2</sup>                | 165.99(10) | O(8) <sup>#3</sup> -Cd(1)-O(6) <sup>#2</sup> | 84.61(10) |
| O(5) <sup>#1</sup> -Cd(1)-O(3)               | 109.65(10) | N(1)-Cd(1)-O(3)                              | 88.05(11) |
| (8) <sup>#2</sup> -Cd(1)-O(3)                | 164.41(8)  | O(6) <sup>#2</sup> -Cd(1)-O(1)               | 76.57(11) |
| O(6) <sup>#2</sup> -Cd(1)-O(3)               | 92.26(10)  | O(3)-Cd(1)-O(1)                              | 81.00(11) |
| O(5) <sup>#1</sup> -Cd(1)-O(1)               | 168.58(10) | O(7) <sup>#3</sup> -Cd(2)-O(4) <sup>#4</sup> | 92.73(10) |
| N(1)-Cd(1)-O(1)                              | 89.66(12)  | O(7) <sup>#3</sup> -Cd(2)-O(1W)              | 92.85(11) |
| O(8) <sup>#3</sup> -Cd(1)-O(1)               | 83.42(11)  | O(4) <sup>#4</sup> -Cd(2)-O(1W)              | 84.71(10) |
| O(7) <sup>#3</sup> -Cd(2)-O(6) <sup>#2</sup> | 85.83(9)   | O(6) <sup>#2</sup> -Cd(2)-O(2W)              | 82.67(9)  |

|                                              |            |                                |            |
|----------------------------------------------|------------|--------------------------------|------------|
| O(4) <sup>#4</sup> -Cd(2)-O(6) <sup>#2</sup> | 164.39(10) | O(7) <sup>#3</sup> -Cd(2)-O(1) | 85.79(12)  |
| O(1W)-Cd(2)-O(6) <sup>#2</sup>               | 110.88(10) | O(4) <sup>#4</sup> -Cd(2)-O(1) | 88.91(10)  |
| O(7) <sup>#3</sup> -Cd(2)-O(2W)              | 158.60(10) | O(1W)-Cd(2)-O(1)               | 173.41(9)  |
| O(4) <sup>#4</sup> -Cd(2)-O(2W)              | 103.10(11) | O(6) <sup>#2</sup> -Cd(2)-O(1) | 75.48(9)   |
| O(1W)-Cd(2)-O(2W)                            | 74.65(12)  | O(2W)-Cd(2)-O(1)               | 108.53(13) |

Symmetry codes for **2**: #1 = x, y - 1, z; #2 = -x, -y + 2, -z + 1; #3 = x - 1, y - 1, z; #4 = x - 1, y, z.

**Table S3.** Selected bond distances (Å) and angles (°) for **3**.

|                                              |            |                                              |            |
|----------------------------------------------|------------|----------------------------------------------|------------|
| Mn(1)-O(7) <sup>#2</sup>                     | 2.113(2)   | Mn(2)-O(5) <sup>#1</sup>                     | 2.131(2)   |
| Mn(1)-O(6) <sup>#1</sup>                     | 2.1541(19) | Mn(2)-O(2) <sup>#4</sup>                     | 2.195(2)   |
| Mn(1)-O(1)                                   | 2.192(2)   | Mn(2)-O(2W)                                  | 2.204(3)   |
| Mn(1)-N(1)                                   | 2.219(3)   | Mn(2)-O(1W)                                  | 2.228(3)   |
| Mn(1)-O(3)                                   | 2.250(2)   | Mn(2)-O(3)                                   | 2.240(2)   |
| Mn(1)-O(8) <sup>#3</sup>                     | 2.270(2)   | Mn(2)-O(8) <sup>#3</sup>                     | 2.259(2)   |
| O(7) <sup>#2</sup> -Mn(1)-O(6) <sup>#1</sup> | 89.38(9)   | N(1)-Mn(1)-O(8) <sup>#3</sup>                | 168.92(9)  |
| O(7) <sup>#2</sup> -Mn(1)-O(1)               | 100.97(8)  | O(3)-Mn(1)-O(8) <sup>#3</sup>                | 74.50(8)   |
| O(6) <sup>#1</sup> -Mn(1)-O(1)               | 169.33(8)  | O(5) <sup>#1</sup> -Mn(2)-O(2) <sup>#4</sup> | 91.18(9)   |
| O(7) <sup>#2</sup> -Mn(1)-N(1)               | 92.40(10)  | O(5) <sup>#1</sup> -Mn(2)-O(2W)              | 165.65(9)  |
| O(6) <sup>#1</sup> -Mn(1)-N(1)               | 88.47(9)   | O(2) <sup>#4</sup> -Mn(2)-O(2W)              | 97.62(9)   |
| O(1)-Mn(1)-N(1)                              | 88.48(9)   | O(5) <sup>#1</sup> -Mn(2)-O(1W)              | 90.80(9)   |
| O(7) <sup>#2</sup> -Mn(1)-O(3)               | 171.74(8)  | O(2) <sup>#4</sup> -Mn(2)-O(1W)              | 84.76(9)   |
| O(6) <sup>#1</sup> -Mn(1)-O(3)               | 88.11(9)   | O(2W)-Mn(2)-O(1W)                            | 78.80(10)  |
| O(1)-Mn(1)-O(3)                              | 82.00(8)   | O(5) <sup>#1</sup> -Mn(2)-O(3)               | 91.67(9)   |
| N(1)-Mn(1)-O(3)                              | 95.39(10)  | O(2) <sup>#4</sup> -Mn(2)-O(3)               | 87.37(8)   |
| O(7) <sup>#2</sup> -Mn(1)-O(8) <sup>#3</sup> | 97.50(8)   | O(2W)-Mn(2)-O(3)                             | 100.01(10) |
| O(6) <sup>#1</sup> -Mn(1)-O(8) <sup>#3</sup> | 86.68(8)   | O(1W)-Mn(2)-O(3)                             | 171.80(9)  |
| O(1)-Mn(1)-O(8) <sup>#3</sup>                | 94.48(8)   | O(5) <sup>#1</sup> -Mn(2)-O(8) <sup>#3</sup> | 88.19(8)   |
| O(2) <sup>#4</sup> -Mn(2)-O(8) <sup>#3</sup> | 162.24(8)  | O(1W)-Mn(2)-O(8) <sup>#3</sup>               | 112.99(8)  |
| O(2W)-Mn(2)-O(8) <sup>#3</sup>               | 86.85(9)   | O(3)-Mn(2)-O(8) <sup>#3</sup>                | 74.91(8)   |

Symmetry codes for **3**: #1 = x - 1, y - 1, z; #2 = x, y - 1, z; #3 = -x + 2, -y + 1, -z + 1; #4 = x - 1, y, z; #5 = -x + 2, -y + 1, -z.

**Table S4.** Selected bond distances (Å) and angles (°) for **4**.

|                          |          |                          |          |
|--------------------------|----------|--------------------------|----------|
| Zn(1)-O(3) <sup>#1</sup> | 1.966(3) | Zn(2)-O(5) <sup>#4</sup> | 1.940(4) |
| Zn(1)-O(8) <sup>#2</sup> | 1.975(4) | Zn(2)-N(4) <sup>#3</sup> | 1.983(4) |
| Zn(1)-N(1)               | 1.986(5) | Zn(2)-N(5)               | 1.989(4) |

|                                              |            |                                              |            |
|----------------------------------------------|------------|----------------------------------------------|------------|
| Zn(1)-O(2)                                   | 2.006(3)   | Zn(2)-O(1)                                   | 2.004(4)   |
| O(3) <sup>#1</sup> -Zn(1)-O(8) <sup>#2</sup> | 104.86(16) | O(5) <sup>#4</sup> -Zn(2)-N(4) <sup>#3</sup> | 116.3(2)   |
| O(3) <sup>#1</sup> -Zn(1)-N(1)               | 115.34(18) | O(5) <sup>#4</sup> -Zn(2)-N(5)               | 124.8(2)   |
| O(8) <sup>#2</sup> -Zn(1)-N(1)               | 107.35(18) | N(4) <sup>#3</sup> -Zn(2)-N(5)               | 110.3(2)   |
| O(3) <sup>#1</sup> -Zn(1)-O(2)               | 104.63(15) | O(5) <sup>#4</sup> -Zn(2)-O(1)               | 95.60(18)  |
| O(8) <sup>#2</sup> -Zn(1)-O(2)               | 102.54(15) | N(4) <sup>#3</sup> -Zn(2)-O(1)               | 111.83(17) |
| N(1)-Zn(1)-O(2)                              | 120.41(18) | N(5)-Zn(2)-O(1)                              | 93.05(17)  |

Symmetry codes for **4**: #1 = -x, -y, -z + 1; #2 = -x + 1, -y, -z + 1; #3 = -x, y - 1/2, -z + 3/2; #4 = -x + 1, y + 1/2, -z + 1.5.

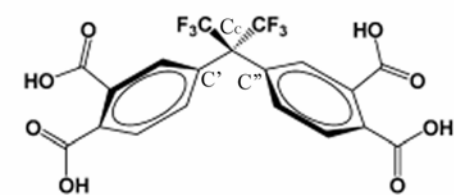

(I)

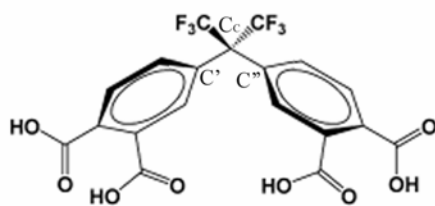

(II)

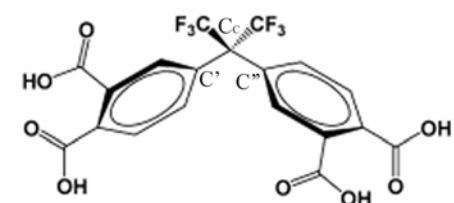

(III)

**Scheme S1.** The three configurations of H<sub>4</sub>hfpdpt.

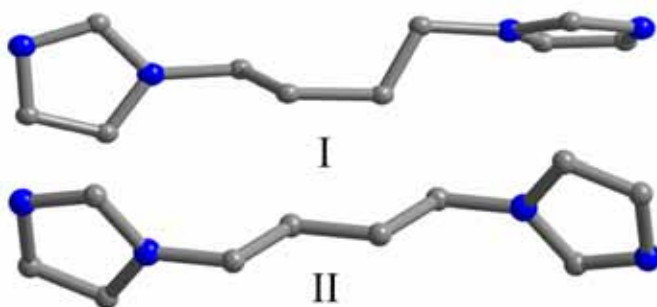

**Fig. S1.** The two coordination modes of biim-4 ligand.

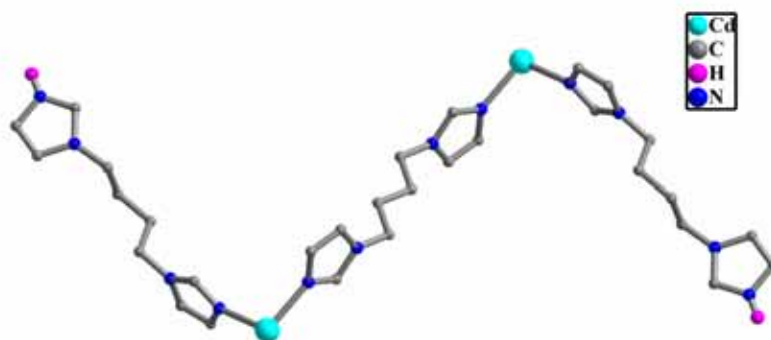

**Fig. S2.** View of the discrete segment based on the biim-4 ligands and the Cd(II) ions in **1**.

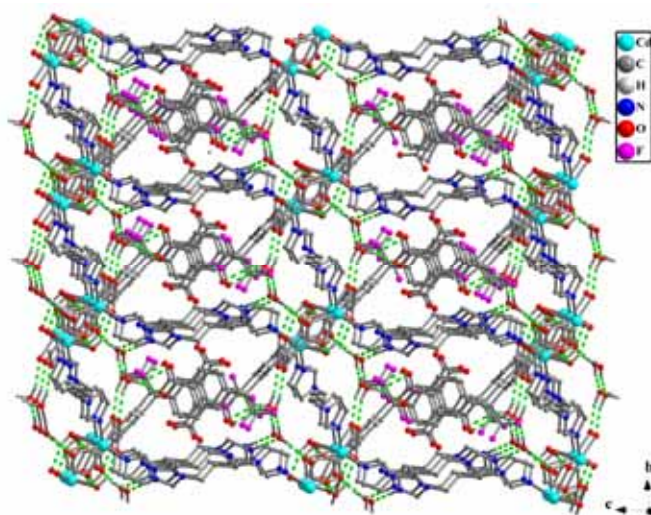

**Fig. S3.** The 3D supramolecular framework of **1**.

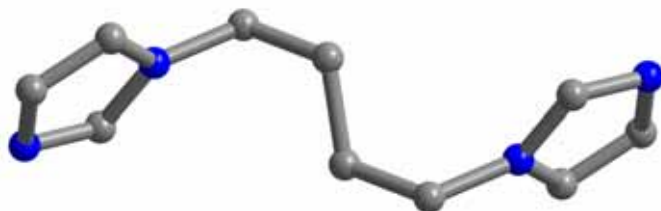

**Fig. S4.** Coordination mode of the biim-4 ligand in **2**.



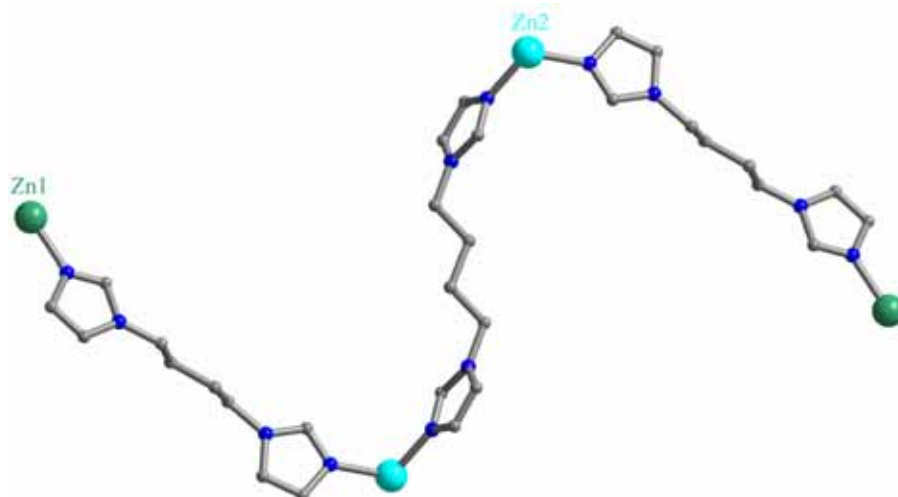

**Fig. S8.** View of the discrete segment based on the biim-4 ligands and the Cd(II) ions in **4**.

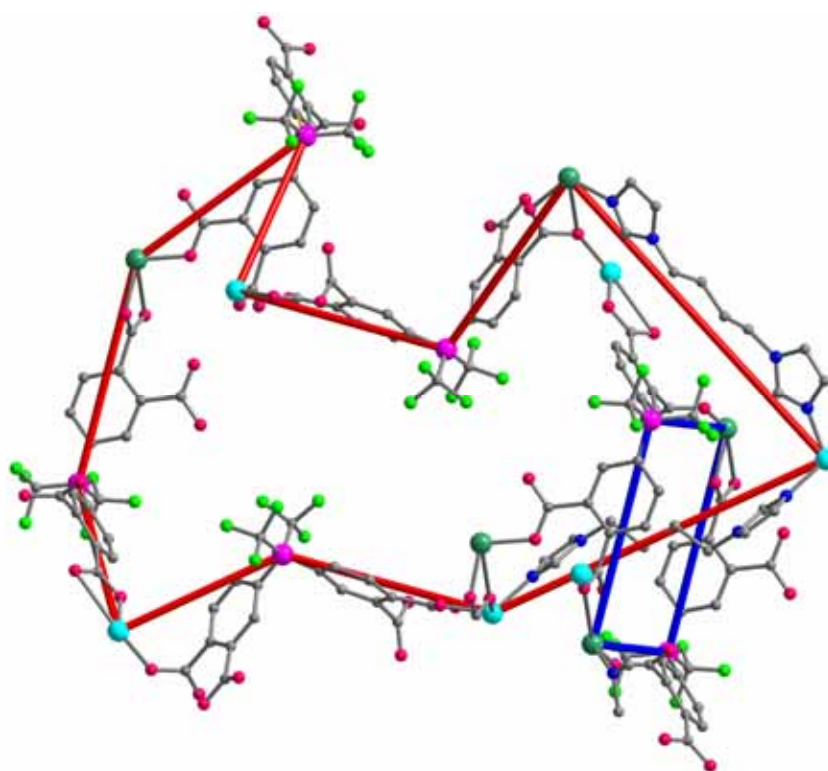

**Fig. S9.** A schematic illustration of the shortest four-membered circuits passed through by rods of biim-4 ligands of the ten-membered ring in **4**.

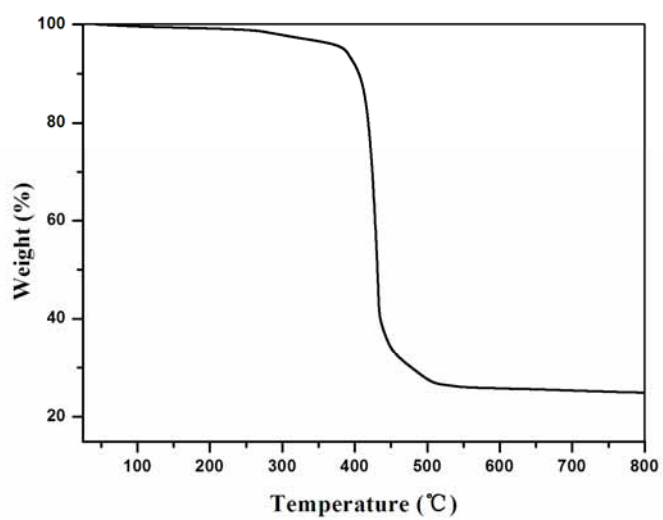

**Fig. S10.** TGA curve of **1**.

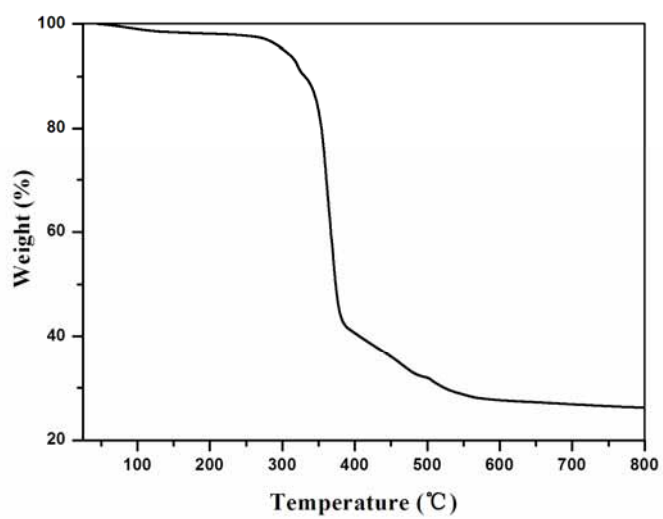

**Fig. S11.** TGA curve of **2**.



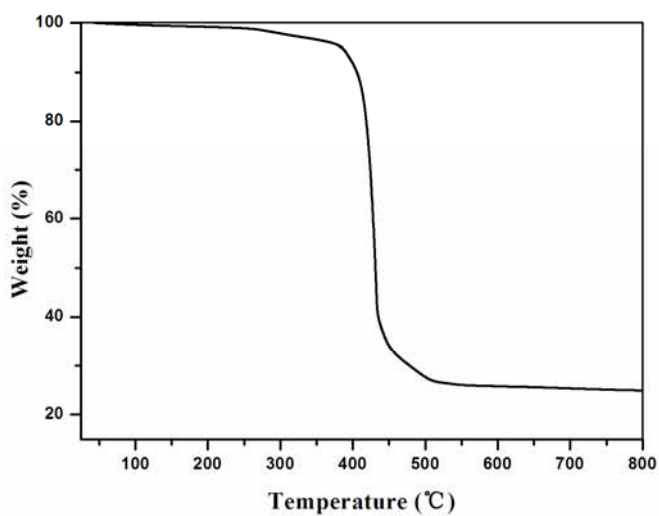

**Fig. S12.** TGA curve of **4**.

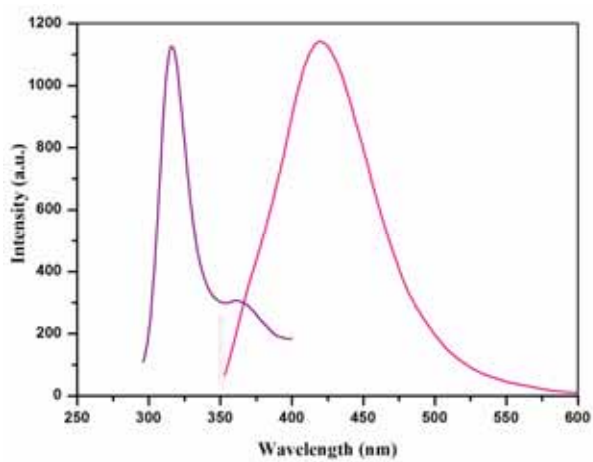

**Fig. S13.** Emission and the excitation spectra of **1**.

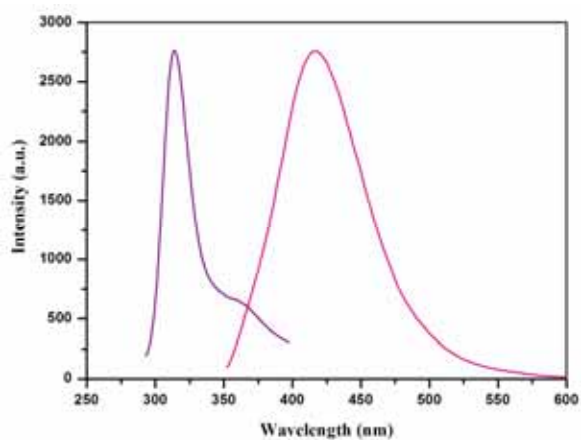

**Fig. S14.** Emission and the excitation spectra of **2**.

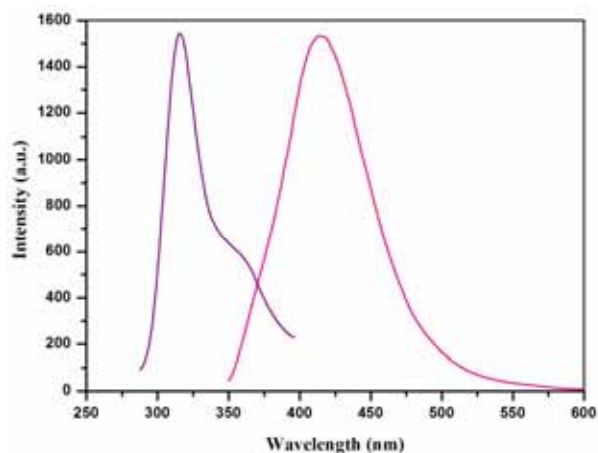

Fig. S15. Emission and the excitation spectra of **4**.

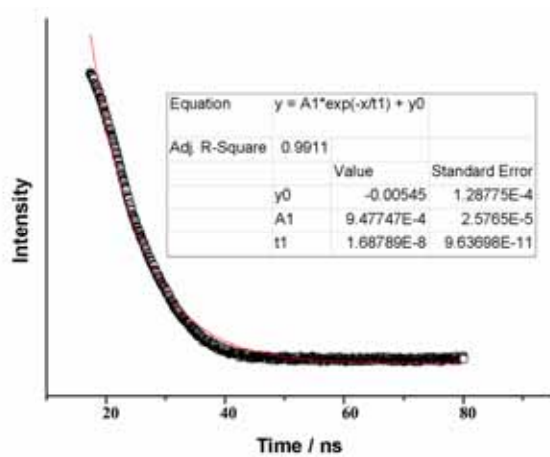

(a)

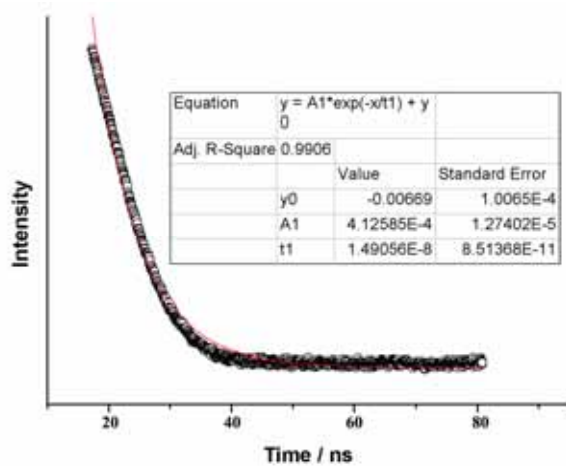

(b)

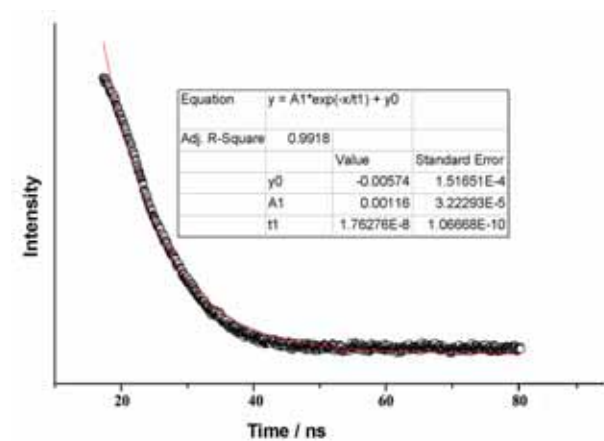

(c)

**Fig. S16.** Luminescent decay for **1** ( $\lambda_{em} = 420$  nm) (a), **2** ( $\lambda_{em} = 417$  nm) (b) and **4** ( $\lambda_{em} = 416$  nm) (c).
